# Supplementary material
Source: Elsevier journal article supplement (https://www.sciencedirect.com/science/article/pii/S253001801830146X)
Supplement: mmc1 [file S253001801830146X:mmc1.docx]

Table 1. Pearson's correlations between items and scales of the ThyPROes.

| **Item (abbreviated**  **wording)** | **Scale** | | | | | | | | | | | | |
| --- | --- | --- | --- | --- | --- | --- | --- | --- | --- | --- | --- | --- | --- |
| **Goiter** | **Hyper** | **Hypo** | **Eye** | **Tiredness** | **Cognitive** | **Anxiety** | **Depression** | **Susceptibility** | **Social** | **Daily life** | **Sexual** | **Cosmetics** |
| **Goiter** |  |  |  |  |  |  |  |  |  |  |  |  |  |
| Hinchazón en cuello | **0.64** | 0.38 | 0.29 | 0.23 | 0.22 | 0.22 | 0.25 | 0.15 | 0.23 | 0.14 | 0.15 | 0.14 | 0.27 |
| Bulto visible | **0.47** | 0.33 | 0.18 | 0.09 | 0.24 | 0.14 | 0.23 | 0.15 | 0.21 | 0.21 | 0.20 | 0.15 | 0.21 |
| Presión en garganta | **0.81** | 0.53 | 0.43 | 0.44 | 0.42 | 0.26 | 0.40 | 0.36 | 0.35 | 0.24 | 0.32 | 0.22 | 0.43 |
| Dolor delante de la garganta | **0.66** | 0.54 | 0.44 | 0.51 | 0.39 | 0.31 | 0.38 | 0.25 | 0.24 | 0.19 | 0.22 | 0.12 | 0.31 |
| Dolor irradia a oídos | **0.58** | 0.55 | 0.51 | 0.44 | 0.34 | 0.27 | 0.37 | 0.27 | 0.30 | 0.23 | 0.29 | 0.20 | 0.38 |
| Nudo en la garganta | **0.82** | 0.57 | 0.42 | 0.46 | 0.42 | 0.26 | 0.43 | 0.36 | 0.35 | 0.24 | 0.31 | 0.18 | 0.30 |
| Aclararse la voz a menudo | **0.68** | 0.54 | 0.46 | 0.47 | 0.36 | 0.29 | 0.35 | 0.26 | 0.31 | 0.24 | 0.32 | 0.14 | 0.36 |
| Molestias al tragar | **0.82** | 0.52 | 0.46 | 0.44 | 0.39 | 0.32 | 0.40 | 0.31 | 0.27 | 0.23 | 0.29 | 0.12 | 0.34 |
| Dificultad al tragar | **0.81** | 0.50 | 0.43 | 0.46 | 0.38 | 0.30 | 0.36 | 0.29 | 0.27 | 0.22 | 0.29 | 0.10 | 0.40 |
| Sensación de ahogamiento | **0.75** | 0.54 | 0.47 | 0.50 | 0.42 | 0.26 | 0.44 | 0.37 | 0.38 | 0.25 | 0.36 | 0.22 | 0.40 |
| **Hyper** |  |  |  |  |  |  |  |  |  |  |  |  |  |
| Temblor en las manos | 0.50 | **0.60** | 0.50 | 0.46 | 0.49 | 0.36 | 0.45 | 0.45 | 0.45 | 0.28 | 0.26 | 0.31 | 0.34 |
| Tendencia a sudar mucho | 0.48 | **0.63** | 0.57 | 0.50 | 0.56 | 0.40 | 0.52 | 0.49 | 0.47 | 0.25 | 0.33 | 0.44 | 0.40 |
| Palpitaciones | 0.48 | **0.65** | 0.54 | 0.47 | 0.39 | 0.44 | 0.53 | 0.38 | 0.35 | 0.25 | 0.30 | 0.25 | 0.20 |
| Falta de aire | 0.52 | **0.70** | 0.61 | 0.60 | 0.49 | 0.43 | 0.56 | 0.42 | 0.44 | 0.32 | 0.30 | 0.30 | 0.29 |
| Intolerancia al calor | 0.46 | **0.59** | 0.55 | 0.55 | 0.48 | 0.46 | 0.48 | 0.37 | 0.40 | 0.27 | 0.30 | 0.29 | 0.37 |
| Aumento de apetito | 0.40 | **0.47** | 0.47 | 0.45 | 0.40 | 0.44 | 0.38 | 0.21 | 0.36 | 0.28 | 0.33 | 0.28 | 0.35 |
| Heces líquidas o blandas | 0.26 | **0.39*†** | 0.32 | 0.30 | 0.27 | 0.17 | *0.40* | 0.31 | 0.34 | 0.16 | 0.19 | 0.23 | 0.13 |
| Malestar de estómago | *0.53* | **0.52†** | *0.60* | 0.50 | *0.53* | 0.44 | 0.51 | 0.49 | 0.49 | 0.28 | 0.40 | 0.34 | 0.28 |

Table 1 (continued)

| **Item (abbreviated**  **wording)** | **Scale** | | | | | | | | | | | | |
| --- | --- | --- | --- | --- | --- | --- | --- | --- | --- | --- | --- | --- | --- |
| **Goiter** | **Hyper** | **Hypo** | **Eye** | **Tiredness** | **Cognitive** | **Anxiety** | **Depression** | **Susceptibility** | **Social** | **Daily life** | **Sexual** | **Cosmetics** |
| **Hypo** |  |  |  |  |  |  |  |  |  |  |  |  |  |
| Intolerancia al frío | 0.46 | *0.53* | **0.50†** | 0.46 | 0.49 | 0.50 | 0.48 | 0.43 | 0.44 | 0.27 | 0.33 | 0.39 | 0.28 |
| Hinchazón de manos o pies | 0.41 | *0.62* | **0.49†** | *0.54* | *0.50* | *0.50* | 0.42 | 0.42 | 0.45 | 0.35 | 0.43 | 0.35 | 0.39 |
| Piel seca | 0.34 | 0.53 | **0.62** | 0.56 | 0.50 | 0.54 | 0.47 | 0.44 | 0.50 | 0.30 | 0.43 | 0.43 | 0.37 |
| Picor en la piel | 0.46 | *0.66* | **0.64†** | 0.54 | 0.56 | 0.52 | 0.56 | 0.50 | 0.51 | 0.26 | 0.41 | 0.34 | 0.35 |
| **Eye** |  |  |  |  |  |  |  |  |  |  |  |  |  |
| Lagrimeo u ojos llorosos | 0.47 | 0.61 | 0.59 | **0.64** | 0.45 | 0.40 | 0.53 | 0.43 | 0.42 | 0.27 | 0.31 | 0.29 | 0.27 |
| Párpados hinchados | 0.43 | 0.53 | 0.56 | **0.62** | 0.52 | 0.43 | 0.48 | 0.48 | 0.46 | 0.37 | 0.36 | 0.34 | 0.34 |
| Sequedad o "arenilla" en en ojos | 0.49 | 0.54 | 0.54 | **0.75** | 0.44 | 0.41 | 0.41 | 0.32 | 0.32 | 0.24 | 0.28 | 0.26 | 0.35 |
| Empeoramiento en la visión | 0.33 | 0.56 | 0.49 | **0.67** | 0.47 | 0.46 | 0.46 | 0.38 | 0.40 | 0.26 | 0.34 | 0.35 | 0.45 |
| Presión en los ojos | 0.44 | 0.54 | 0.44 | **0.78** | 0.41 | 0.40 | 0.44 | 0.35 | 0.32 | 0.22 | 0.32 | 0.22 | 0.36 |
| Visión doble | 0.40 | 0.50 | 0.50 | **0.66** | 0.33 | 0.37 | 0.33 | 0.25 | 0.20 | 0.19 | 0.28 | 0.17 | 0.46 |
| Dolor ocular | 0.44 | 0.56 | 0.50 | **0.79** | 0.45 | 0.43 | 0.48 | 0.36 | 0.35 | 0.26 | 0.32 | 0.27 | 0.39 |
| Sensibilidad a la luz | 0.39 | 0.53 | 0.63 | **0.73** | 0.49 | 0.46 | 0.48 | 0.42 | 0.42 | 0.26 | 0.39 | 0.32 | 0.49 |
| **Tiredness** |  |  |  |  |  |  |  |  |  |  |  |  |  |
| Sentirse cansado | 0.52 | 0.68 | 0.74 | 0.60 | **0.76** | 0.64 | 0.62 | 0.57 | 0.63 | 0.44 | 0.55 | 0.43 | 0.49 |
| Sentirse exhausto | 0.50 | 0.68 | 0.70 | 0.54 | **0.76** | 0.60 | 0.65 | 0.62 | 0.66 | 0.54 | 0.53 | 0.43 | 0.44 |
| Poca iniciativa | 0.44 | 0.61 | 0.63 | 0.49 | **0.78** | 0.67 | 0.63 | 0.65 | 0.64 | 0.47 | 0.58 | 0.38 | 0.43 |
| Sentirse agotado | 0.57 | 0.68 | 0.68 | 0.57 | **0.82** | 0.61 | 0.62 | 0.61 | 0.65 | 0.49 | 0.55 | 0.42 | 0.46 |
| Sentirse lleno de vida | 0.15 | 0.23 | 0.26 | 0.20 | **0.52†** | 0.18 | 0.30 | *0.55* | *0.56* | 0.33 | 0.42 | 0.30 | 0.25 |
| Sentirse con energía | 0.23 | 0.40 | 0.38 | 0.39 | **0.70** | 0.29 | 0.38 | 0.57 | 0.58 | 0.32 | 0.42 | 0.35 | 0.32 |
| Afrontar demandas de la vida cotidiana | 0.25 | 0.34 | 0.26 | 0.34 | **0.55** | 0.29 | 0.35 | 0.53 | 0.53 | 0.44 | 0.51 | 0.24 | 0.38 |

Table 1 (continued)

| **Item (abbreviated**  **wording)** | **Scale** | | | | | | | | | | | | |
| --- | --- | --- | --- | --- | --- | --- | --- | --- | --- | --- | --- | --- | --- |
| **Goiter** | **Hyper** | **Hypo** | **Eye** | **Tiredness** | **Cognitive** | **Anxiety** | **Depression** | **Susceptibility** | **Social** | **Daily life** | **Sexual** | **Cosmetics** |
| **Cognitive** |  |  |  |  |  |  |  |  |  |  |  |  |  |
| Dificultad para recordar | 0.25 | 0.50 | 0.57 | 0.45 | 0.51 | **0.83** | 0.53 | 0.41 | 0.44 | 0.40 | 0.43 | 0.37 | 0.30 |
| Pensamiento lento o poco claro | 0.27 | 0.49 | 0.58 | 0.44 | 0.54 | **0.83** | 0.52 | 0.40 | 0.46 | 0.42 | 0.44 | 0.39 | 0.35 |
| Dificultad para encontrar palabras | 0.24 | 0.44 | 0.50 | 0.39 | 0.42 | **0.79** | 0.38 | 0.30 | 0.37 | 0.34 | 0.28 | 0.31 | 0.20 |
| Sentirse confuso | 0.34 | 0.51 | 0.60 | 0.52 | 0.54 | **0.83** | 0.55 | 0.44 | 0.48 | 0.43 | 0.49 | 0.34 | 0.33 |
| Dificultades para aprender cosas | 0.28 | 0.52 | 0.63 | 0.48 | 0.52 | **0.83** | 0.53 | 0.49 | 0.50 | 0.34 | 0.46 | 0.45 | 0.28 |
| Dificultades para concentrarse | 0.40 | 0.58 | 0.67 | 0.55 | 0.65 | **0.79** | 0.62 | 0.54 | 0.62 | 0.43 | 0.54 | 0.39 | 0.40 |
| **Anxiety** |  |  |  |  |  |  |  |  |  |  |  |  |  |
| Sentirse nervioso | 0,42 | 0,64 | 0,60 | 0,55 | 0,61 | 0,57 | **0,80** | 0,64 | 0,59 | 0,38 | 0,43 | 0,41 | 0,36 |
| Sentir miedo o ansiedad | 0,52 | 0,67 | 0,64 | 0,58 | 0,62 | 0,60 | **0,85** | 0,66 | 0,63 | 0,39 | 0,44 | 0,35 | 0,38 |
| Sentirse tenso | 0,45 | 0,65 | 0,58 | 0,58 | 0,65 | 0,60 | **0,86** | 0,71 | 0,69 | 0,46 | 0,49 | 0,43 | 0,40 |
| Preocupación por estar muy enfermo | 0,30 | 0,44 | 0,38 | 0,34 | 0,39 | 0,36 | **0,66** | 0,55 | 0,55 | 0,40 | 0,45 | 0,27 | 0,37 |
| Sentirse incómodo | 0,36 | 0,60 | 0,51 | 0,47 | 0,57 | 0,49 | **0,82** | 0,67 | 0,69 | 0,54 | 0,53 | 0,42 | 0,37 |
| Sentirse inquieto | 0,43 | 0,63 | 0,58 | 0,50 | 0,53 | 0,46 | **0,84** | 0,70 | 0,65 | 0,45 | 0,46 | 0,40 | 0,31 |
| **Depression** |  |  |  |  |  |  |  |  |  |  |  |  |  |
| Sentirse triste | 0.42 | 0.59 | 0.64 | 0.49 | 0.64 | 0.51 | 0.74 | **0.81** | 0.71 | 0.44 | 0.49 | 0.46 | 0.31 |
| Sentirse deprimido | 0.41 | 0.56 | 0.63 | 0.51 | 0.70 | 0.52 | 0.73 | **0.88** | 0.78 | 0.47 | 0.55 | 0.46 | 0.35 |
| Sentirse desanimado | 0.40 | 0.58 | 0.61 | 0.49 | 0.73 | 0.54 | 0.75 | **0.87** | 0.81 | 0.50 | 0.56 | 0.49 | 0.35 |
| Llorar a menudo | 0.37 | 0.53 | 0.51 | 0.40 | 0.57 | 0.38 | 0.64 | **0.71** | 0.64 | 0.38 | 0.45 | 0.33 | 0.31 |
| Sentirse infeliz | 0.32 | 0.48 | 0.52 | 0.42 | 0.63 | 0.37 | 0.68 | **0.85** | 0.72 | 0.52 | 0.58 | 0.36 | 0.38 |
| Sentirse feliz | 0.14 | 0.30 | 0.26 | 0.29 | 0.57 | 0.26 | 0.45 | **0.68** | 0.65 | 0.42 | 0.46 | 0.33 | 0.35 |
| Tener confianza en sí mismo | 0.14 | 0.28 | 0.25 | 0.20 | 0.51 | 0.28 | 0.41 | **0.59†** | *0.62* | 0.35 | 0.46 | 0.27 | 0.32 |

Table 1 (continued)

| **Item (abbreviated**  **wording)** | **Scale** | | | | | | | | | | | | |
| --- | --- | --- | --- | --- | --- | --- | --- | --- | --- | --- | --- | --- | --- |
| **Goiter** | **Hyper** | **Hypo** | **Eye** | **Tiredness** | **Cognitive** | **Anxiety** | **Depression** | **Susceptibility** | **Social** | **Daily life** | **Sexual** | **Cosmetics** |
| **Susceptibility** |  |  |  |  |  |  |  |  |  |  |  |  |  |
| Dificultad para superar problemas | 0.35 | 0.44 | 0.49 | 0.34 | 0.54 | 0.48 | 0.53 | 0.61 | **0.61** | 0.40 | 0.57 | 0.35 | 0.37 |
| Sentirse extraño consigo mismo | 0.32 | 0.38 | 0.42 | 0.31 | 0.55 | 0.41 | 0.56 | 0.66 | **0.68** | 0.49 | 0.60 | 0.38 | 0.41 |
| Estresarse con facilidad | 0.39 | 0.54 | 0.53 | 0.43 | 0.66 | 0.53 | 0.63 | 0.60 | **0.74** | 0.59 | 0.59 | 0.45 | 0.44 |
| Cambios de ánimo | 0.38 | 0.62 | 0.61 | 0.51 | 0.68 | 0.52 | 0.71 | 0.73 | **0.81** | 0.51 | 0.56 | 0.46 | 0.40 |
| Sentirse irritable | 0.38 | 0.61 | 0.58 | 0.47 | 0.69 | 0.54 | 0.69 | 0.70 | **0.82** | 0.49 | 0.51 | 0.60 | 0.42 |
| Sentirse frustrado | 0.34 | 0.51 | 0.52 | 0.40 | 0.67 | 0.45 | 0.65 | 0.80 | **0.84** | 0.60 | 0.66 | 0.50 | 0.40 |
| Sentirse enfadado | 0.37 | 0.54 | 0.55 | 0.41 | 0.62 | 0.38 | 0.69 | 0.75 | **0.76** | 0.49 | 0.51 | 0.45 | 0.37 |
| Tener el control de la vida | 0.12 | 0.27 | 0.31 | 0.23 | *0.51* | 0.27 | 0.29 | *0.53* | **0.48†** | 0.34 | 0.36 | 0.39 | 0.26 |
| Sentirse equilibrado | 0.13 | 0.24 | 0.31 | 0.16 | 0.45 | 0.26 | 0.34 | 0.51 | **0.59** | 0.45 | 0.42 | 0.38 | 0.23 |
| **Social** |  |  |  |  |  |  |  |  |  |  |  |  |  |
| Dificultad para estar con otros | 0.33 | 0.42 | 0.45 | 0.35 | 0.52 | 0.39 | 0.51 | 0.50 | 0.60 | **0.62** | 0.57 | 0.41 | 0.32 |
| Sentirse una carga | 0.20 | 0.23 | 0.26 | 0.25 | 0.42 | 0.34 | 0.38 | 0.47 | 0.46 | **0.49** | 0.57 | 0.27 | 0.30 |
| Tener conflictos con otras personas | 0.11 | 0.18 | 0.23 | 0.09 | 0.30 | 0.28 | 0.31 | 0.29 | *0.44* | **0.39*†** | 0.36 | 0.29 | 0.25 |
| Sentir que no le comprenden | 0.19 | 0.26 | 0.19 | 0.25 | 0.36 | 0.29 | 0.26 | 0.28 | 0.34 | **0.41** | 0.36 | 0.20 | 0.36 |

Table 1 (continued)

| **Item (abbreviated**  **wording)** | **Scale** | | | | | | | | | | | | |
| --- | --- | --- | --- | --- | --- | --- | --- | --- | --- | --- | --- | --- | --- |
| **Goiter** | **Hyper** | **Hypo** | **Eye** | **Tiredness** | **Cognitive** | **Anxiety** | **Depression** | **Susceptibility** | **Social** | **Daily life** | **Sexual** | **Cosmetics** |
| **Daily life** |  |  |  |  |  |  |  |  |  |  |  |  |  |
| Dificultad para manejar vida diaria | 0.37 | 0.41 | 0.40 | 0.30 | 0.51 | 0.40 | 0.44 | 0.47 | 0.60 | 0.55 | **0.79** | 0.40 | 0.43 |
| Limitación actividades de ocio | 0.33 | 0.36 | 0.48 | 0.36 | 0.56 | 0.43 | 0.44 | 0.53 | 0.60 | 0.57 | **0.81** | 0.45 | 0.55 |
| No participar en vida alrededor | 0.28 | 0.32 | 0.36 | 0.26 | 0.44 | 0.35 | 0.41 | 0.50 | 0.59 | 0.57 | **0.80** | 0.39 | 0.38 |
| Dificultad para desplazarse | 0.22 | 0.33 | 0.34 | 0.34 | 0.52 | 0.34 | 0.39 | 0.45 | 0.49 | 0.50 | **0.74** | 0.27 | 0.40 |
| Tardar en hacer las cosas | 0.29 | 0.40 | 0.48 | 0.38 | 0.61 | 0.51 | 0.41 | 0.50 | 0.54 | 0.46 | **0.61** | 0.46 | 0.44 |
| Cumplir con el trabajo | 0.41 | 0.41 | 0.51 | 0.42 | 0.56 | 0.44 | 0.57 | 0.57 | 0.57 | 0.56 | **0.72** | 0.34 | 0.52 |
| **Sexual** |  |  |  |  |  |  |  |  |  |  |  |  |  |
| Influencia en vida sexual | 0.15 | 0.38 | 0.42 | 0.34 | 0.38 | 0.43 | 0.37 | 0.36 | 0.48 | 0.41 | 0.46 | **0.74** | 0.35 |
| Disminución del deseo sexual | 0.26 | 0.45 | 0.49 | 0.34 | 0.48 | 0.38 | 0.44 | 0.50 | 0.58 | 0.34 | 0.42 | **0.74** | 0.36 |
| **Cosmetics** |  |  |  |  |  |  |  |  |  |  |  |  |  |
| Afecta a su aspecto | 0.49 | 0.48 | 0.43 | 0.48 | 0.44 | 0.38 | 0.42 | 0.31 | 0.37 | 0.35 | 0.38 | 0.29 | **0.67** |
| Insatisfacción con aspecto | 0.44 | 0.39 | 0.36 | 0.43 | 0.45 | 0.29 | 0.41 | 0.38 | 0.40 | 0.40 | 0.54 | 0.29 | **0.75** |
| Intentar disimular o esconder | 0.21 | 0.03 | 0.17 | 0.22 | 0.21 | 0.06 | 0.17 | 0.20 | 0.25 | 0.17 | 0.34 | 0.16 | **0.45** |
| Incomodidad por miradas de otros | 0.06 | 0.01 | 0.10 | 0.31 | 0.10 | 0.08 | 0.12 | 0.12 | 0.14 | 0.18 | 0.20 | 0.07 | **0.34*** |
| Influencia en la ropa | 0.28 | 0.31 | 0.36 | 0.25 | 0.36 | 0.26 | 0.25 | 0.28 | 0.34 | 0.28 | 0.39 | 0.36 | **0.51** |
| Sentirse demasiado gordo | 0.30 | 0.42 | 0.39 | 0.32 | 0.45 | 0.28 | 0.31 | 0.34 | 0.40 | 0.35 | 0.41 | 0.36 | **0.53** |

Item-own scale correlations are in bold. Items marked with * lacked convergent validity. Items marked with **†** lacked discriminant validity, with coefficients in italics indicating the scales they correlated higher with.

Scale abbreviations. Goiter: Goiter symptoms; Hyper: Hyperthyroidism symptoms; Hypo: Hypothyroidism symptoms; Eye: Eye symptoms; Cognitive: cognitive complaints; Susceptibility: Emotional susceptibility; Social: Impaired social life; Daily life: Impaired daily life; Sexual: Impaired sex life; Cosmetics: Cosmetic complaints.

Table 2. Pearson's correlations between items and scales of the ThyPRO-39es.

| **Item (abbreviated**  **wording)** |  | **Scale** | | | | | | | | | | | |
| --- | --- | --- | --- | --- | --- | --- | --- | --- | --- | --- | --- | --- | --- |
| **Goiter** | | **Hyper** | **Hypo** | **Eye** | **Tiredness** | **Cognitive** | **Anxiety** | **Depression** | **Susceptibility** | **Social** | **Daily life** | **Cosmetics** |
| **Goiter** |  | |  |  |  |  |  |  |  |  |  |  |  |
| Hinchazón en cuello | **0.65** | | 0.38 | 0.29 | 0.21 | 0.23 | 0.23 | 0.26 | 0.15 | 0.22 | 0.15 | 0.18 | 0.26 |
| Presión en garganta | **0.76** | | 0.53 | 0.43 | 0.40 | 0.41 | 0.26 | 0.42 | 0.34 | 0.34 | 0.23 | 0.30 | 0.43 |
| Molestias al tragar | **0.72** | | 0.53 | 0.47 | 0.37 | 0.39 | 0.30 | 0.39 | 0.31 | 0.26 | 0.21 | 0.28 | 0.29 |
| **Hyper** |  | |  |  |  |  |  |  |  |  |  |  |  |
| Temblor en las manos | 0.45 | | **0.59** | 0.50 | 0.42 | 0.48 | 0.38 | 0.45 | 0.43 | 0.46 | 0.22 | 0.26 | 0.31 |
| Tendencia a sudar mucho | 0.36 | | **0.54†** | *0.58* | 0.43 | *0.57* | 0.40 | 0.54 | 0.50 | 0.44 | 0.26 | 0.34 | 0.37 |
| Palpitaciones | 0.43 | | **0.60** | 0.55 | 0.44 | 0.39 | 0.44 | 0.54 | 0.37 | 0.34 | 0.22 | 0.30 | 0.24 |
| Malestar de estómago | 0.44 | | **0.49†** | *0.60* | 0.43 | *0.52* | 0.41 | *0.51* | 0.46 | *0.52* | 0.27 | 0.40 | 0.27 |
| **Hypo** |  | |  |  |  |  |  |  |  |  |  |  |  |
| Intolerancia al frío | 0.41 | | 0.47 | **0.50†** | 0.44 | *0.52* | *0.51* | 0.48 | 0.44 | 0.44 | 0.33 | 0.31 | 0.25 |
| Hinchazón de manos o pies | 0.35 | | *0.58* | **0.49†** | *0.52* | *0.54* | 0.49 | 0.42 | 0.40 | 0.44 | 0.33 | 0.40 | 0.37 |
| Piel seca | 0.28 | | 0.54 | **0.63** | 0.60 | 0.53 | 0.56 | 0.48 | 0.41 | 0.50 | 0.30 | 0.43 | 0.37 |
| Picor en la piel | 0.38 | | *0.68* | **0.65†** | 0.47 | 0.56 | 0.53 | 0.57 | 0.50 | 0.49 | 0.28 | 0.39 | 0.36 |
| **Eye** |  | |  |  |  |  |  |  |  |  |  |  |  |
| Sequedad o "arenilla" en en ojos | 0.40 | | 0.47 | 0.54 | **0.62** | 0.46 | 0.39 | 0.43 | 0.31 | 0.33 | 0.19 | 0.26 | 0.33 |
| Empeoramiento en la visión | 0.26 | | 0.50 | 0.49 | **0.66** | 0.51 | 0.46 | 0.47 | 0.36 | 0.43 | 0.22 | 0.33 | 0.44 |
| Sensibilidad a la luz | 0.30 | | 0.46 | 0.64 | **0.67** | 0.50 | 0.45 | 0.48 | 0.40 | 0.45 | 0.27 | 0.36 | 0.48 |
| **Tiredness** |  | |  |  |  |  |  |  |  |  |  |  |  |
| Sentirse cansado | 0.45 | | 0.65 | *0.74* | 0.62 | **0.71†** | 0.67 | 0.65 | 0.53 | 0.64 | 0.42 | 0.54 | 0.45 |
| Poca iniciativa | 0.38 | | 0.59 | 0.64 | 0.46 | **0.74** | 0.68 | 0.64 | 0.63 | 0.63 | 0.46 | 0.57 | 0.36 |
| Sentirse con energía | 0.17 | | 0.40 | 0.39 | 0.38 | **0.52†** | 0.31 | 0.40 | *0.55* | *0.61* | 0.28 | 0.40 | 0.26 |
| **Cognitive** |  | |  |  |  |  |  |  |  |  |  |  |  |
| Dificultad para recordar | 0.22 | | 0.48 | 0.59 | 0.44 | 0.55 | **0.81** | 0.54 | 0.40 | 0.46 | 0.37 | 0.45 | 0.30 |
| Pensamiento lento o poco claro | 0.28 | | 0.46 | 0.58 | 0.44 | 0.58 | **0.83** | 0.54 | 0.40 | 0.48 | 0.40 | 0.46 | 0.35 |
| Dificultades para concentrarse | 0.33 | | 0.54 | 0.69 | 0.51 | 0.67 | **0.74** | 0.64 | 0.53 | 0.62 | 0.46 | 0.55 | 0.39 |
| **Anxiety** |  | |  |  |  |  |  |  |  |  |  |  |  |
| Sentir miedo o ansiedad | 0.45 | | 0.65 | 0.65 | 0.53 | 0.63 | 0.62 | **0.84** | 0.64 | 0.59 | 0.41 | 0.42 | 0.36 |
| Sentirse tenso | 0.38 | | 0.62 | 0.59 | 0.53 | 0.66 | 0.61 | **0.88** | 0.68 | 0.64 | 0.46 | 0.46 | 0.35 |
| Sentirse incómodo | 0.29 | | 0.57 | 0.50 | 0.41 | 0.53 | 0.48 | **0.71** | 0.68 | 0.60 | 0.56 | 0.48 | 0.38 |

Table 2 (continued)

| **Item (abbreviated**  **wording)** | **Scale** | | | | | | | | | | | |
| --- | --- | --- | --- | --- | --- | --- | --- | --- | --- | --- | --- | --- |
| **Goiter** | **Hyper** | **Hypo** | **Eye** | **Tiredness** | **Cognitive** | **Anxiety** | **Depression** | **Susceptibility** | **Social** | **Daily life** | **Cosmetics** |
| **Depression** |  |  |  |  |  |  |  |  |  |  |  |  |
| Sentirse triste | 0.37 | 0.60 | 0.64 | 0.46 | 0.64 | 0.52 | *0.72* | **0.65†** | 0.65 | 0.46 | 0.46 | 0.27 |
| Sentirse infeliz | 0.27 | 0.52 | 0.52 | 0.39 | 0.59 | 0.39 | 0.67 | **0.75** | 0.64 | 0.53 | 0.54 | 0.34 |
| Tener confianza en sí mismo | 0.14 | 0.33 | 0.26 | 0.19 | 0.46 | 0.31 | 0.42 | **0.50†** | *0.57* | 0.35 | 0.44 | 0.25 |
| **Susceptibility** |  |  |  |  |  |  |  |  |  |  |  |  |
| Estresarse con facilidad | 0.35 | 0.50 | 0.53 | 0.43 | 0.63 | 0.53 | 0.62 | 0.58 | **0.65** | 0.58 | 0.57 | 0.42 |
| Cambios de ánimo | 0.31 | 0.57 | 0.61 | 0.46 | *0.67* | 0.55 | *0.70* | *0.68* | **0.63†** | 0.51 | 0.54 | 0.36 |
| Tener el control de la vida | 0.12 | 0.34 | 0.33 | 0.26 | *0.49* | 0.31 | 0.31 | *0.53* | **0.37*†** | 0.35 | *0.40* | 0.23 |
| **Social** |  |  |  |  |  |  |  |  |  |  |  |  |
| Dificultad para estar con otros | 0.23 | 0.36 | 0.44 | 0.31 | 0.47 | 0.40 | 0.50 | 0.49 | 0.57 | **0.59** | 0.56 | 0.29 |
| Sentirse una carga | 0.18 | 0.21 | 0.26 | 0.21 | 0.36 | 0.38 | 0.38 | 0.48 | 0.40 | **0.49†** | *0.55* | 0.22 |
| Tener conflictos con otras personas | 0.12 | 0.18 | 0.23 | 0.08 | 0.24 | 0.27 | 0.32 | 0.27 | *0.40* | **0.39*†** | 0.36 | 0.32 |
| **Daily life** |  |  |  |  |  |  |  |  |  |  |  |  |
| Dificultad para manejar vida diaria | 0.31 | 0.39 | 0.40 | 0.30 | 0.47 | 0.43 | 0.46 | 0.48 | 0.54 | 0.57 | **0.73** | 0.39 |
| No participar en vida alrededor | 0.24 | 0.30 | 0.36 | 0.26 | 0.40 | 0.37 | 0.39 | 0.49 | 0.51 | 0.62 | **0.71** | 0.32 |
| Tardar en hacer las cosas | 0.22 | 0.40 | 0.50 | 0.37 | *0.61* | *0.54* | 0.42 | 0.50 | *0.54* | 0.48 | **0.53†** | 0.34 |
| **Cosmetics** |  |  |  |  |  |  |  |  |  |  |  |  |
| Afecta a su aspecto | 0.44 | 0.45 | 0.44 | 0.47 | 0.45 | 0.40 | 0.42 | 0.30 | 0.41 | 0.33 | 0.37 | **0.49** |
| Incomodidad por miradas de otros | 0.06 | 0.01 | 0.10 | 0.28 | 0.08 | 0.12 | 0.11 | 0.14 | 0.14 | 0.12 | 0.14 | **0.30*** |
| Influencia en la ropa | 0.24 | 0.29 | 0.36 | 0.27 | 0.32 | 0.25 | 0.26 | 0.29 | 0.29 | 0.27 | 0.35 | **0.36*** |

Item-own scale correlations are in bold. Items marked with * lacked convergent validity. Items marked with **†** lacked discriminant validity, with coefficients in italics indicating the scales they correlated higher with.

Scale abbreviations. Goiter: Goiter symptoms; Hyper: Hyperthyroidism symptoms; Eye: Eye symptoms; Cognitive: Cognitive complaints; Susceptibility: Emotional susceptibility; Social: Impaired social life; Daily life: Impaired daily life; Cosmetics: Cosmetic complaints.

Table 3. Inter-scale correlations of the ThyPROes

|  | **Goiter** | **Hyper** | **Hypo** | **Eye** | **Tiredness** | **Cognitive** | **Anxiety** | **Depression** | **Susceptibility** | **Social** | **Daily life** | **Sexual** | **Cosmetics** |
| --- | --- | --- | --- | --- | --- | --- | --- | --- | --- | --- | --- | --- | --- |
| **Goiter** |  |  |  |  |  |  |  |  |  |  |  |  |  |
| **Hyper** | 0.67 |  |  |  |  |  |  |  |  |  |  |  |  |
| **Hypo** | 0.55 | 0.77 |  |  |  |  |  |  |  |  |  |  |  |
| **Eye** | 0.55 | 0.70 | 0.68 |  |  |  |  |  |  |  |  |  |  |
| **Tiredness** | 0.49 | 0.67 | 0.67 | 0.57 |  |  |  |  |  |  |  |  |  |
| **Cognitive** | 0.34 | 0.58 | 0.68 | 0.54 | 0.61 |  |  |  |  |  |  |  |  |
| **Anxiety** | 0.48 | 0.70 | 0.64 | 0.58 | 0.65 | 0.60 |  |  |  |  |  |  |  |
| **Depression** | 0.38 | 0.57 | 0.59 | 0.48 | 0.75 | 0.49 | 0.76 |  |  |  |  |  |  |
| **Susceptibility** | 0.40 | 0.60 | 0.62 | 0.47 | 0.78 | 0.55 | 0.73 | 0.85 |  |  |  |  |  |
| **Social** | 0.29 | 0.38 | 0.39 | 0.33 | 0.55 | 0.45 | 0.50 | 0.53 | 0.63 |  |  |  |  |
| **Daily Life** | 0.38 | 0.45 | 0.52 | 0.42 | 0.65 | 0.50 | 0.54 | 0.61 | 0.68 | 0.64 |  |  |  |
| **Sexual** | 0.23 | 0.45 | 0.49 | 0.36 | 0.47 | 0.43 | 0.44 | 0.46 | 0.58 | 0.40 | 0.47 |  |  |
| **Cosmetics** | 0.46 | 0.44 | 0.46 | 0.50 | 0.51 | 0.35 | 0.42 | 0.41 | 0.47 | 0.43 | 0.55 | 0.38 |  |

Scale abbreviations. Goiter: Goiter symptoms; Hyper: Hyperthyroidism symptoms; Hypo: Hypothyroidism symptoms; Eye: Eye symptoms; Cognitive: Cognitive complaints; Susceptibility: Emotional susceptibility; Social: Impaired social life; Daily life: Impaired daily life; Sexual: Impaired sex life; Cosmetics: Cosmetic complaints.
